# Supplementary material for: Reactivity of cationic silver clusters with O2: a probe of interplay between clusters’ geometric and electronic structures
Source: Royal Society of Chemistry journal article supplement (doi:10.1039/d3cp05082c), 2024-01-01
Supplement: d3cp05082c1.pdf [file d3cp05082c1.pdf]

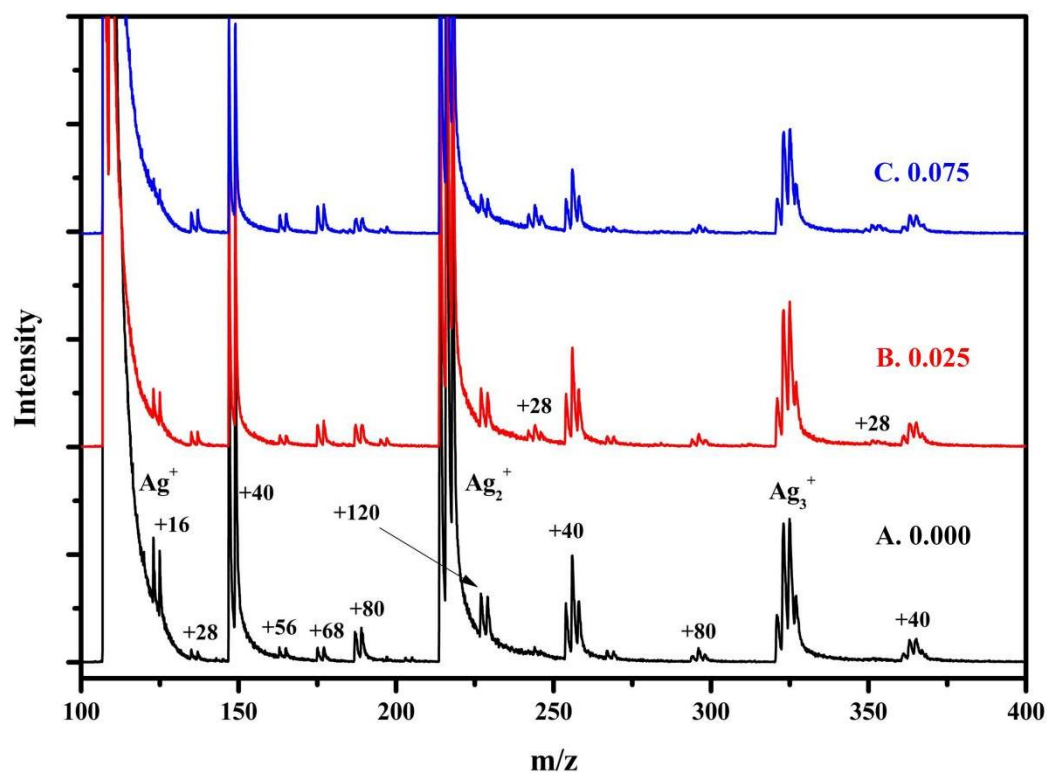

Figure S1. The mass spectra of  $Ag_n^+$  ( $n = 1-3$ ) with  $O_2$  flow of 0.000 sccm (Curve A), 0.025 sccm (Curve B) and 0.075 sccm (Curve C) at 150 K. No reaction products between  $Ag_n^+$  ( $n = 1-3$ ) and  $O_2$  were observed.
