# Supplementary material for: Reactivity of cationic silver clusters with O2: a probe of interplay between clusters’ geometric and electronic structures
Source: Royal Society of Chemistry journal article supplement (doi:10.1039/d3cp05082c), 2024-01-01
Supplement: d3cp05082c2.pdf [file d3cp05082c2.pdf]

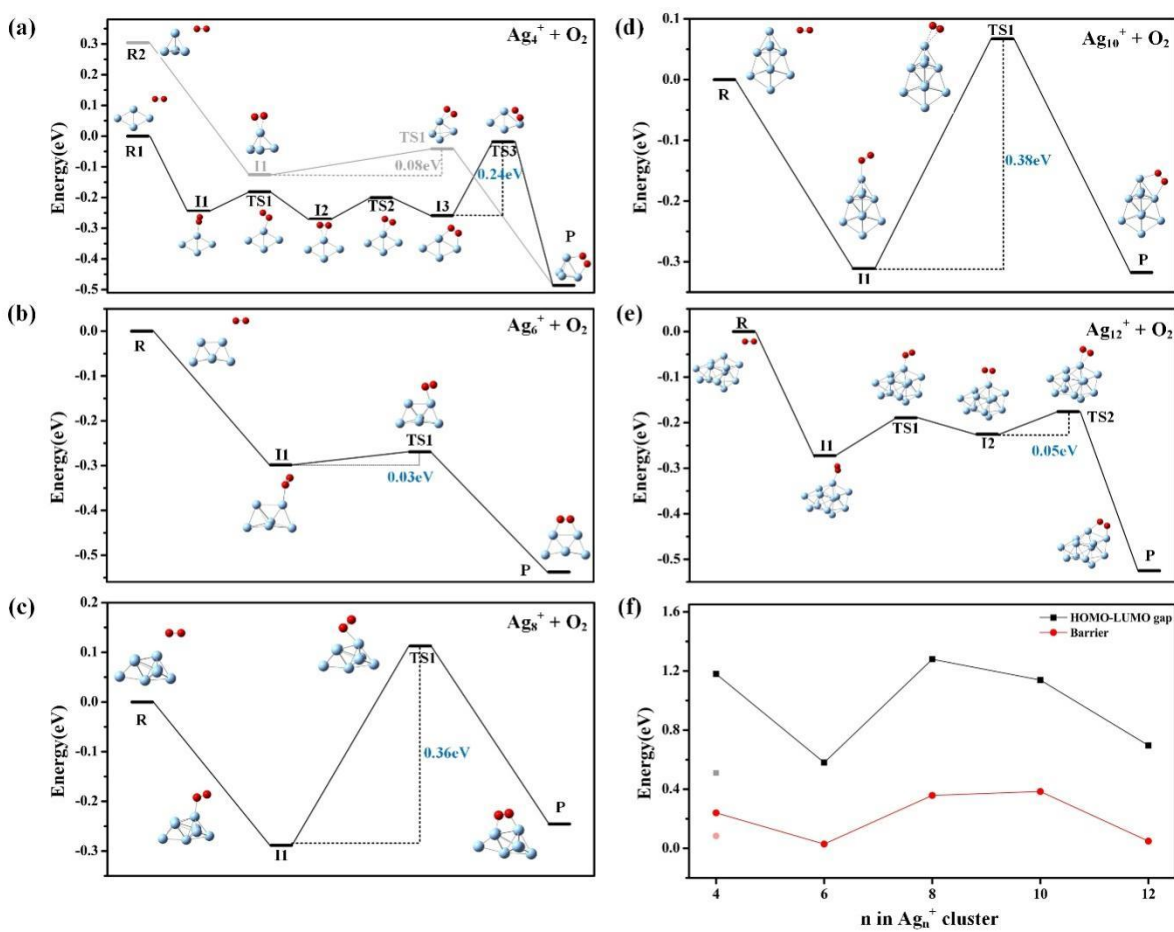

Figure S11. The reaction paths of the dominant structures of  $\text{Ag}_n^+$  ( $n = 4, 6, 8, 10, 12$ ) with  $\text{O}_2$  (a-e) and the comparisons between their barriers from the physisorbed  $\text{O}_2$  to the chemisorbed  $\text{O}_2$  and their HOMO-LUMO gaps. The gray lines in (a) and the gray points in (f) show the results of the pyramid isomer of  $\text{Ag}_4^+$ .

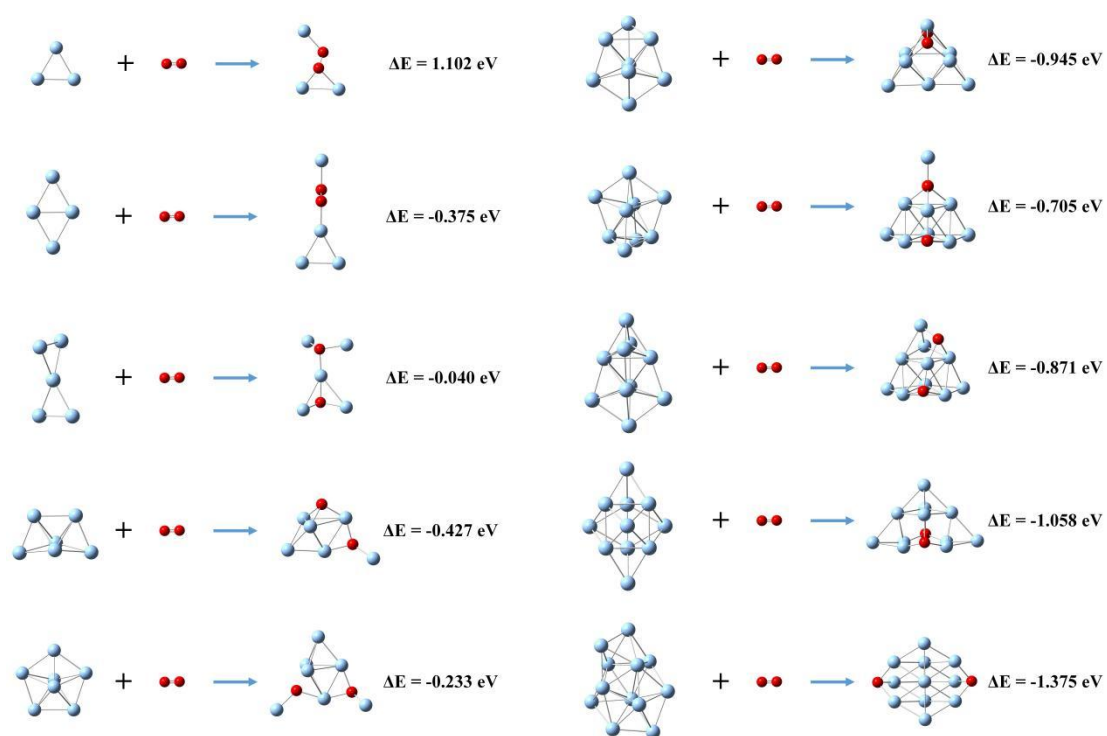

Figure S12. The lowest lying structures of  $\text{Ag}_n\text{O}_2^+$  ( $n = 3-12$ ) with  $\text{O}_2$  inserted into or dissociated on the silver moiety and their energies relative to the initial reactants  $\text{Ag}_n^+$  and  $\text{O}_2$ .

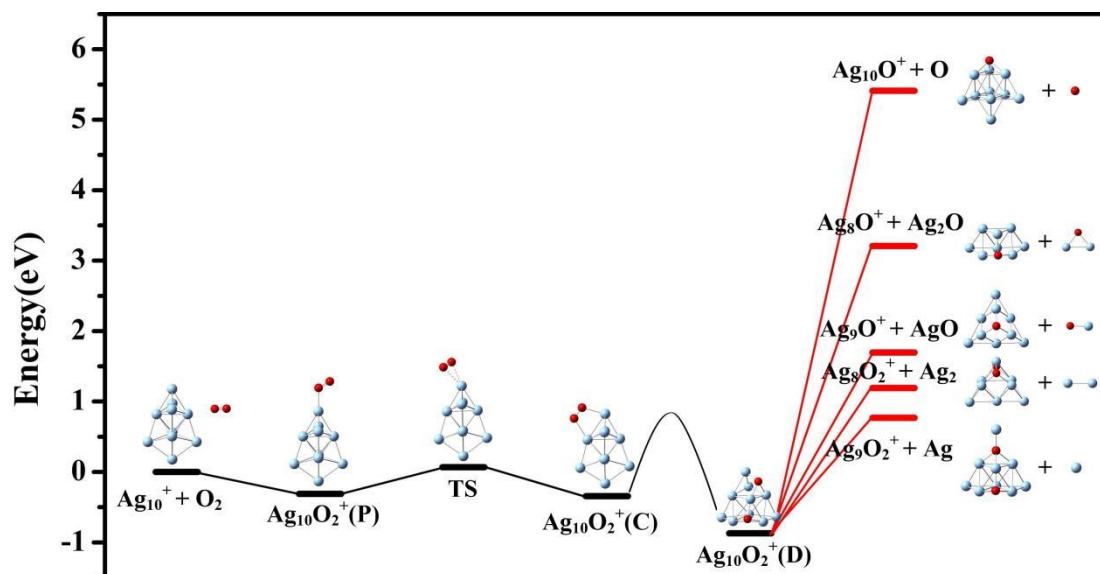

Figure S13. The relative energies of the reaction products between  $\text{Ag}_{10}^+$  with  $\text{O}_2$  including those of the physisorption, the chemisorption, the dissociation, and the etching steps.

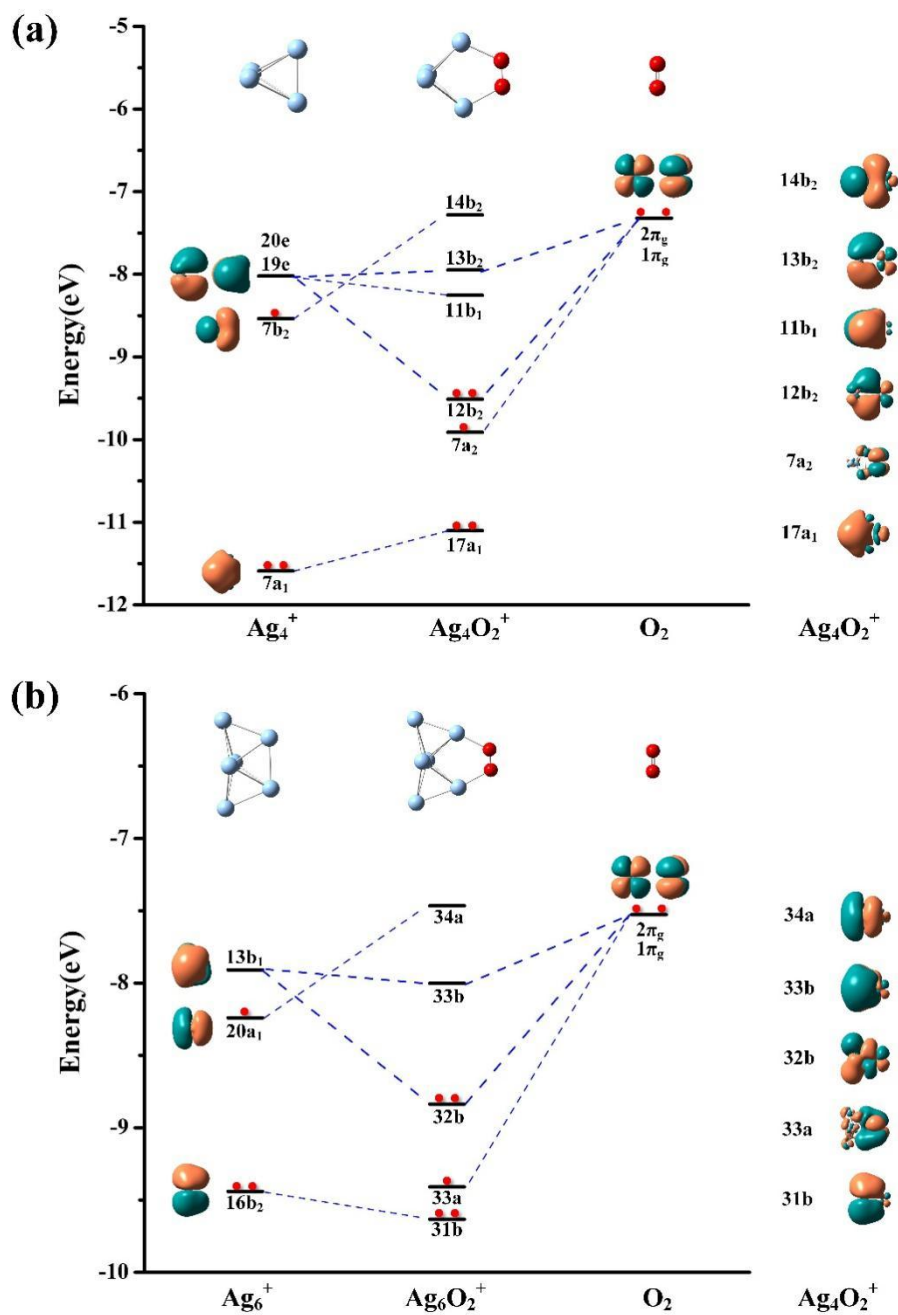

Figure S14. The bonding scheme of  $\text{Ag}_4\text{O}_2^+$ (a) and  $\text{Ag}_6\text{O}_2^+$ (b), illustrating the bonding interactions between the bare cluster  $\text{Ag}_{4/6}^+$  and the  $\text{O}_2$  fragment as well as their canonical Kohn–Sham frontier valence MOs (isosurface = 0.01 a.u.).
