# Supplementary material for: Reactivity of cationic silver clusters with O2: a probe of interplay between clusters’ geometric and electronic structures
Source: Royal Society of Chemistry journal article supplement (doi:10.1039/d3cp05082c), 2024-01-01
Supplement: d3cp05082c4.pdf [file d3cp05082c4.pdf]

**(a) Ag<sub>2-5</sub><sup>+</sup>**

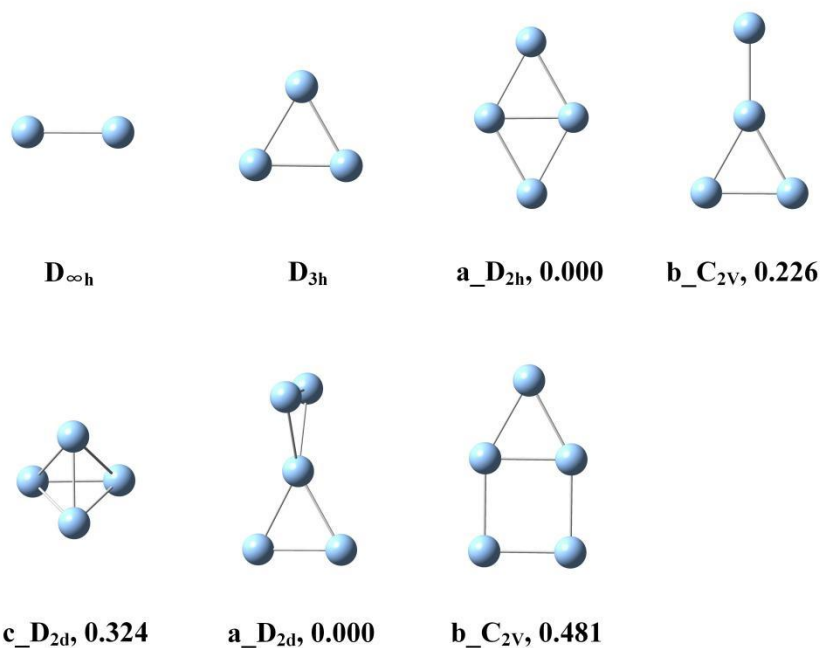

**(b) Ag<sub>6</sub><sup>+</sup>**

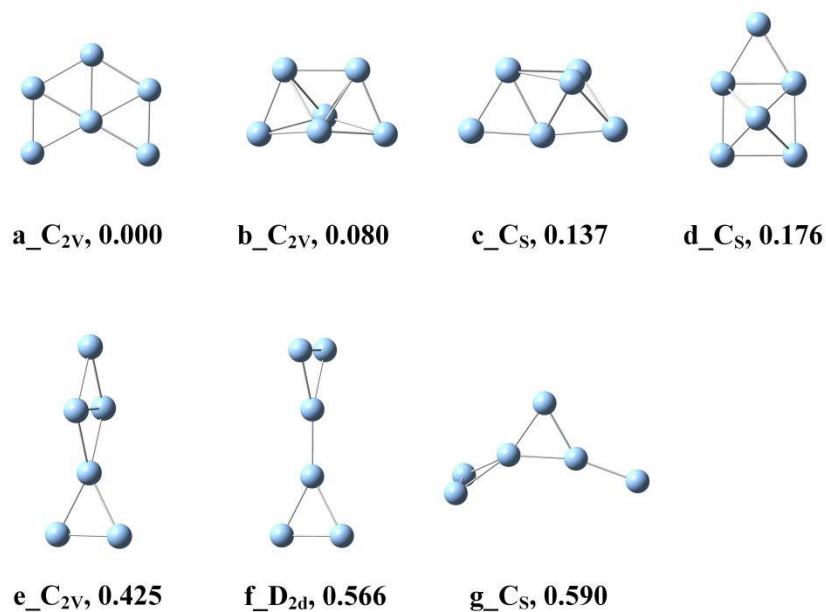

Figure S2. The low-lying structures of Ag<sub>n</sub><sup>+</sup> ( $n = 2-6$ ) determined by the calculations at the PBE/def2-SVP level of theory. The even sizes are in their doublet state and the odd sizes are in their singlet state. The geometry of each structure and its energy (in eV) relative to the lowest-lying one was indicated.

**(a)Ag<sub>7</sub><sup>+</sup>**

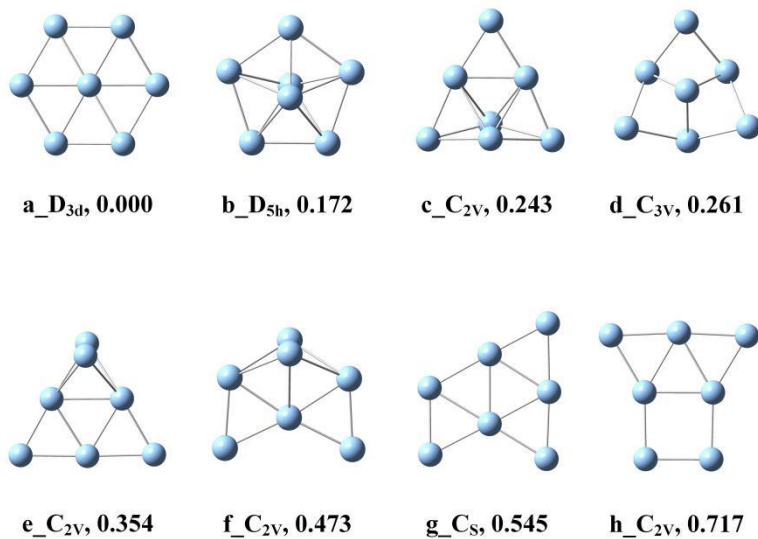

**(b)Ag<sub>8</sub><sup>+</sup>**

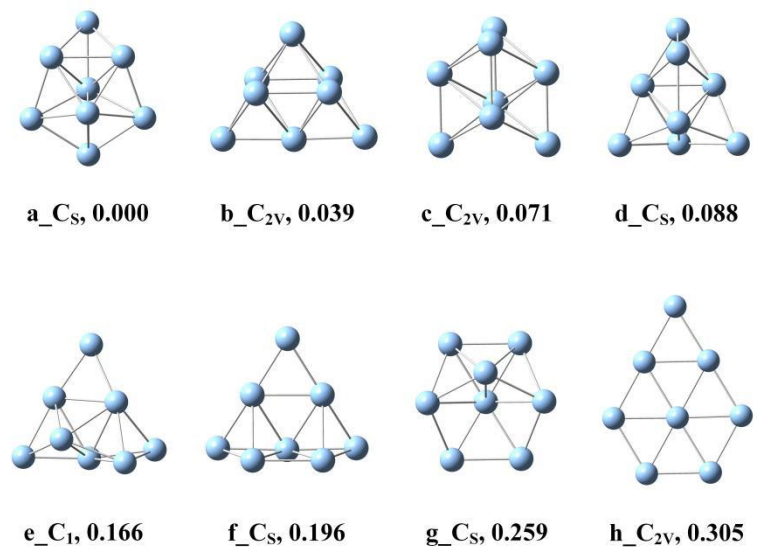

Figure S3. The low-lying eight structures of Ag<sub>7</sub><sup>+</sup> and Ag<sub>8</sub><sup>+</sup> determined by the calculations at the PBE/def2-SVP level of theory. The Ag<sub>7</sub><sup>+</sup> is in its singlet state and the Ag<sub>8</sub><sup>+</sup> is in its doublet state. The geometry of each structure and its energy (in eV) relative to the lowest-lying one was indicated.

**(a)Ag<sub>9</sub><sup>+</sup>**

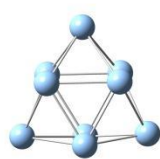

**a\_D<sub>3h</sub>, 0.000**

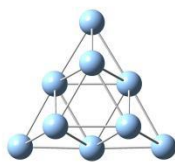

**b\_C<sub>3v</sub>, 0.029**

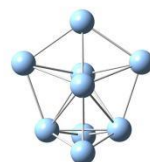

**c\_C<sub>2v</sub>, 0.049**

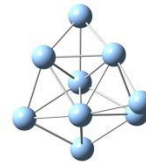

**d\_C<sub>2</sub>, 0.105**

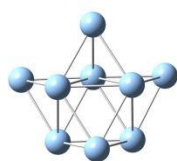

**e\_C<sub>s</sub>, 0.130**

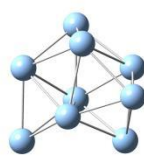

**f\_C<sub>1</sub>, 0.134**

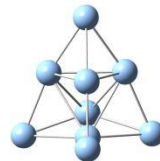

**g\_C<sub>s</sub>, 0.179**

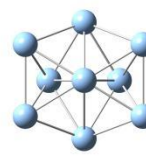

**h\_C<sub>2v</sub>, 0.207**

**(b)Ag<sub>10</sub><sup>+</sup>**

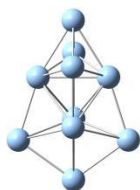

**a\_D<sub>2d</sub>, 0.000**

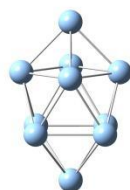

**b\_D<sub>4d</sub>, 0.058**

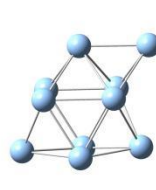

**c\_C<sub>s</sub>, 0.083**

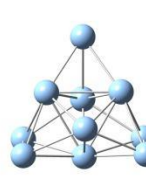

**d\_C<sub>s</sub>, 0.116**

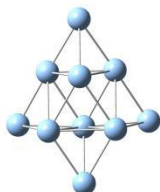

**e\_C<sub>s</sub>, 0.127**

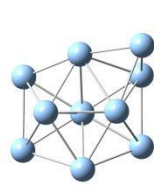

**f\_C<sub>1</sub>, 0.137**

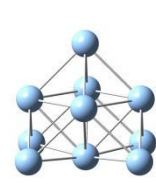

**g\_C<sub>4v</sub>, 0.137**

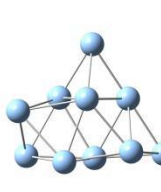

**h\_C<sub>1</sub>, 0.139**

Figure S4. The low-lying eight structures of Ag<sub>9</sub><sup>+</sup> and Ag<sub>10</sub><sup>+</sup> determined by the calculations at the PBE/def2-SVP level of theory. The Ag<sub>9</sub><sup>+</sup> is in its singlet state and the Ag<sub>10</sub><sup>+</sup> is in its doublet state. The geometry of each structure and its energy (in eV) relative to the lowest-lying one was indicated.

**(a)Ag<sub>11</sub><sup>+</sup>**

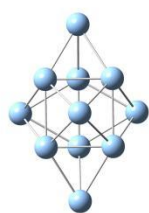

**a\_D<sub>3h</sub>, 0.000**

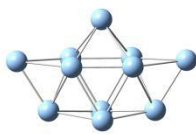

**b\_C<sub>2v</sub>, 0.170**

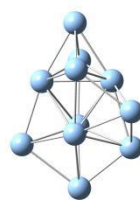

**c\_C<sub>2</sub>, 0.238**

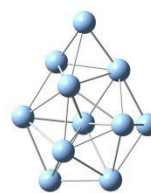

**d\_C<sub>1</sub>, 0.259**

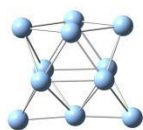

**e\_C<sub>2v</sub>, 0.282**

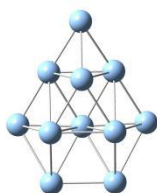

**f\_C<sub>s</sub>, 0.288**

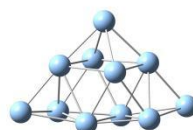

**g\_C<sub>2</sub>, 0.288**

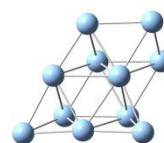

**h\_C<sub>1</sub>, 0.293**

**(b)Ag<sub>12</sub><sup>+</sup>**

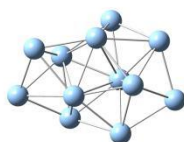

**a\_C<sub>1</sub>, 0.000**

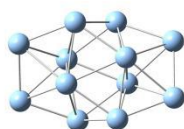

**b\_D<sub>2</sub>, 0.012**

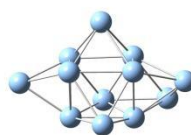

**c\_C<sub>s</sub>, 0.020**

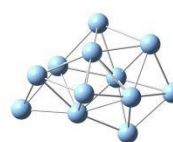

**d\_C<sub>1</sub>, 0.117**

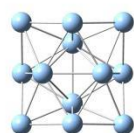

**e\_D<sub>2d</sub>, 0.117**

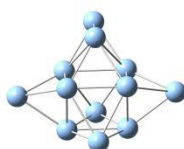

**f\_C<sub>s</sub>, 0.118**

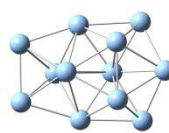

**g\_C<sub>s</sub>, 0.142**

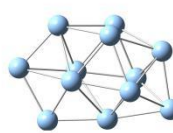

**h\_C<sub>s</sub>, 0.154**

Figure S5. The low-lying eight structures of Ag<sub>11</sub><sup>+</sup> and Ag<sub>12</sub><sup>+</sup> determined by the calculations at the PBE/def2-SVP level of theory. The Ag<sub>11</sub><sup>+</sup> is in its singlet state and the Ag<sub>12</sub><sup>+</sup> is in its doublet state. The geometry of each structure and its energy (in eV) relative to the lowest-lying one was indicated.

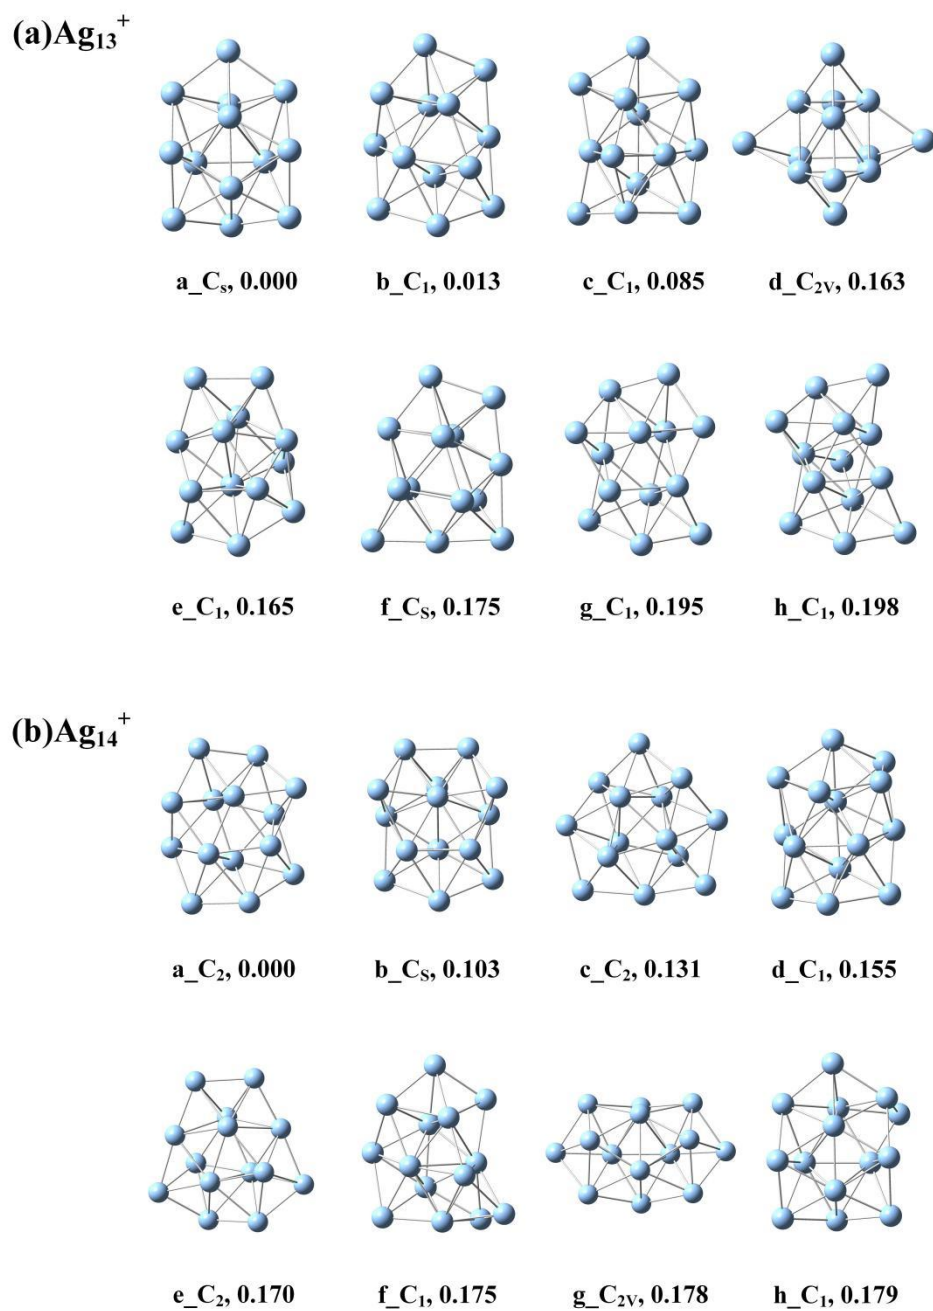

Figure S6. The low-lying eight structures of  $\text{Ag}_{13}^+$  and  $\text{Ag}_{14}^+$  determined by the calculations at the PBE/def2-SVP level of theory. The  $\text{Ag}_{13}^+$  is in its singlet state and the  $\text{Ag}_{14}^+$  is in its doublet state. The geometry of each structure and its energy (in eV) relative to the lowest-lying one was indicated.

**(a) Ag<sub>15</sub><sup>+</sup>**

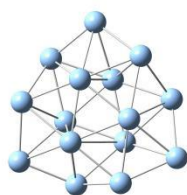

**a\_C<sub>2</sub>, 0.000**

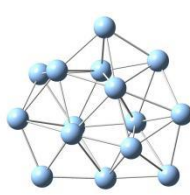

**b\_C<sub>1</sub>, 0.224**

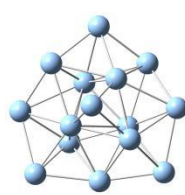

**c\_C<sub>1</sub>, 0.245**

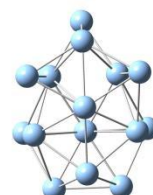

**d\_C<sub>s</sub>, 0.321**

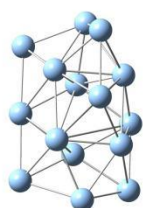

**e\_C<sub>1</sub>, 0.334**

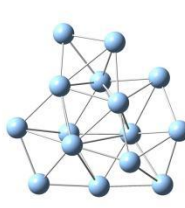

**f\_C<sub>1</sub>, 0.374**

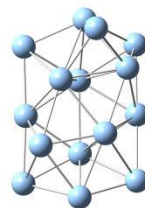

**g\_C<sub>1</sub>, 0.381**

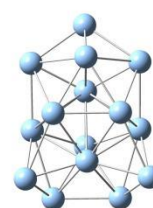

**h\_C<sub>s</sub>, 0.401**

**(b) Ag<sub>16</sub><sup>+</sup>**

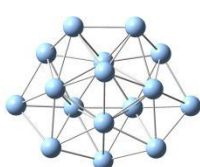

**a\_C<sub>s</sub>, 0.000**

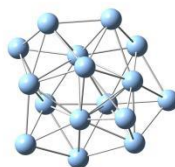

**b\_C<sub>1</sub>, 0.071**

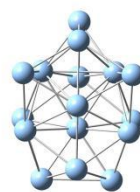

**c\_C<sub>s</sub>, 0.087**

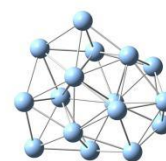

**d\_C<sub>1</sub>, 0.093**

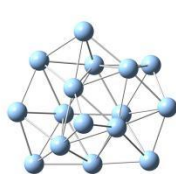

**e\_C<sub>1</sub>, 0.114**

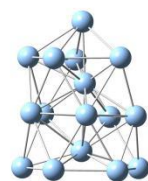

**f\_C<sub>1</sub>, 0.126**

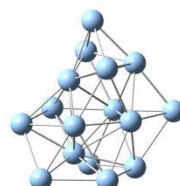

**g\_C<sub>1</sub>, 0.134**

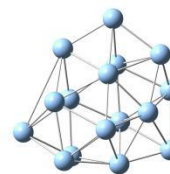

**h\_C<sub>1</sub>, 0.150**

Figure S7. The low-lying eight structures of Ag<sub>15</sub><sup>+</sup> and Ag<sub>16</sub><sup>+</sup> determined by the calculations at the PBE/def2-SVP level of theory. The Ag<sub>15</sub><sup>+</sup> is in its singlet state and the Ag<sub>16</sub><sup>+</sup> is in its doublet state. The geometry of each structure and its energy (in eV) relative to the lowest-lying one was indicated.



**(a)Ag<sub>17</sub><sup>+</sup>**

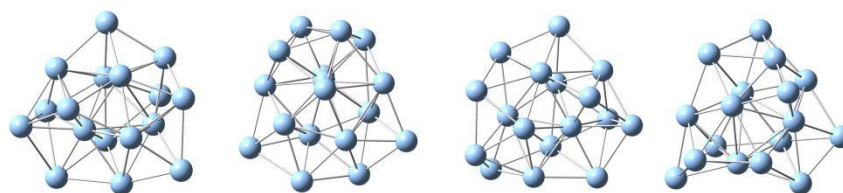

**a\_C<sub>1</sub>, 0.000**

**b\_C<sub>2</sub>, 0.037**

**c\_C<sub>1</sub>, 0.044**

**d\_C<sub>1</sub>, 0.053**

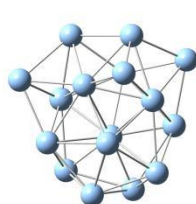

**e\_C<sub>1</sub>, 0.068**

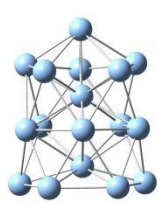

**f\_C<sub>s</sub>, 0.123**

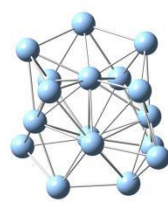

**g\_C<sub>1</sub>, 0.137**

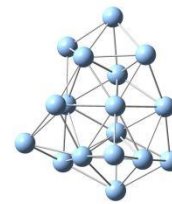

**h\_C<sub>1</sub>, 0.148**

**(b)Ag<sub>18</sub><sup>+</sup>**

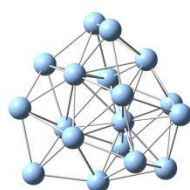

**a\_C<sub>1</sub>, 0.000**

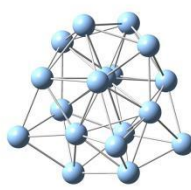

**b\_C<sub>1</sub>, 0.006**

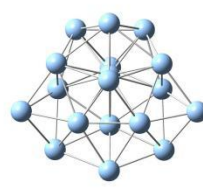

**c\_C<sub>s</sub>, 0.146**

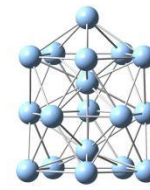

**d\_C<sub>5v</sub>, 0.153**

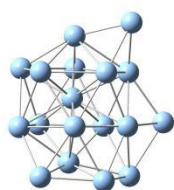

**e\_C<sub>1</sub>, 0.164**

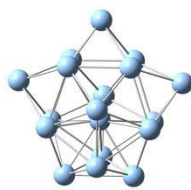

**f\_C<sub>s</sub>, 0.169**

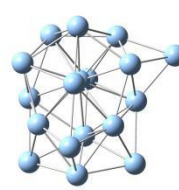

**g\_C<sub>1</sub>, 0.176**

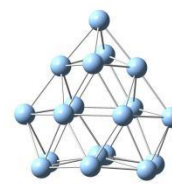

**h\_C<sub>2v</sub>, 0.221**

Figure S8. The low-lying eight structures of Ag<sub>17</sub><sup>+</sup> and Ag<sub>18</sub><sup>+</sup> determined by the calculations at the PBE/def2-SVP level of theory. The Ag<sub>17</sub><sup>+</sup> is in its singlet state and the Ag<sub>18</sub><sup>+</sup> is in its doublet state. The geometry of each structure and its energy (in eV) relative to the lowest-lying one was indicated.

**(a) Ag<sub>19</sub><sup>+</sup>**

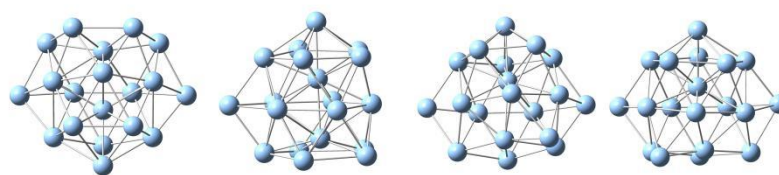

**a\_C<sub>s</sub>, 0.000**

**b\_C<sub>s</sub>, 0.065**

**c\_C<sub>1</sub>, 0.109**

**d\_C<sub>1</sub>, 0.109**

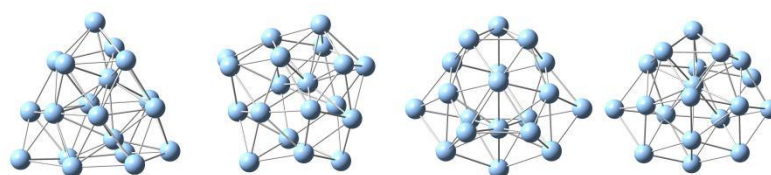

**e\_C<sub>1</sub>, 0.181**

**f\_C<sub>1</sub>, 0.201**

**g\_C<sub>s</sub>, 0.203**

**h\_C<sub>1</sub>, 0.205**

**(b) Ag<sub>20</sub><sup>+</sup>**

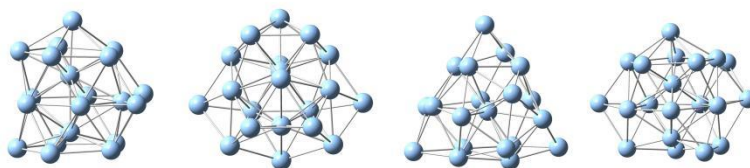

**a\_C<sub>s</sub>, 0.000**

**b\_C<sub>s</sub>, 0.016**

**c\_C<sub>3</sub>, 0.076**

**d\_C<sub>1</sub>, 0.124**

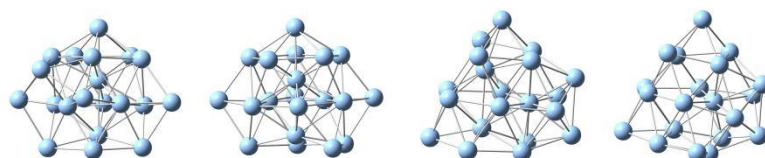

**e\_C<sub>1</sub>, 0.133**

**f\_C<sub>1</sub>, 0.172**

**g\_C<sub>1</sub>, 0.183**

**h\_C<sub>1</sub>, 0.190**

Figure S9. The low-lying eight structures of Ag<sub>19</sub><sup>+</sup> and Ag<sub>20</sub><sup>+</sup> determined by the calculations at the PBE/def2-SVP level of theory. The Ag<sub>19</sub><sup>+</sup> is in its singlet state and the Ag<sub>20</sub><sup>+</sup> is in its doublet state. The geometry of each structure and its energy (in eV) relative to the lowest-lying one was indicated.



**(a)Ag<sub>21</sub><sup>+</sup>**

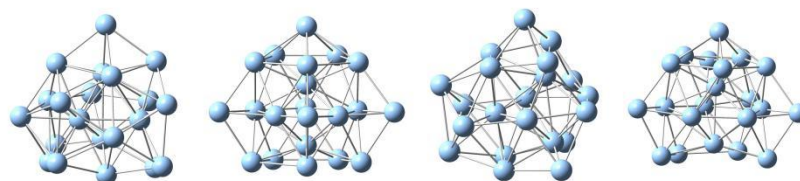

**a\_C<sub>1</sub>, 0.000**

**b\_C<sub>s</sub>, 0.010**

**c\_C<sub>1</sub>, 0.037**

**d\_C<sub>1</sub>, 0.072**

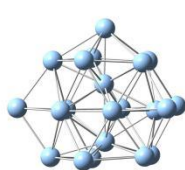

**e\_C<sub>s</sub>, 0.167**

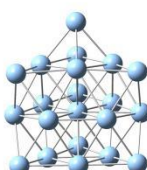

**f\_C<sub>s</sub>, 0.174**

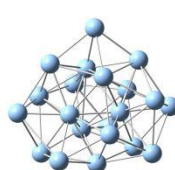

**g\_C<sub>1</sub>, 0.177**

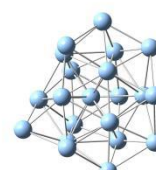

**h\_C<sub>1</sub>, 0.183**

**(b)Ag<sub>22</sub><sup>+</sup>**

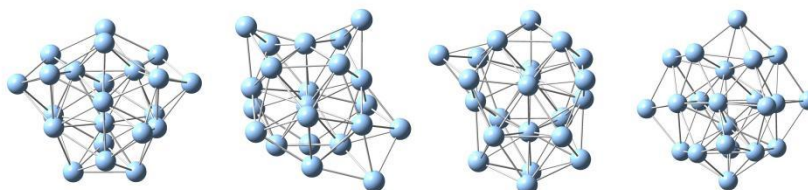

**a\_C<sub>1</sub>, 0.000**

**b\_C<sub>1</sub>, 0.029**

**c\_C<sub>1</sub>, 0.041**

**d\_C<sub>1</sub>, 0.050**

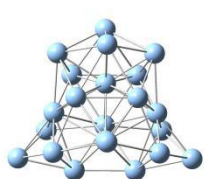

**e\_C<sub>s</sub>, 0.054**

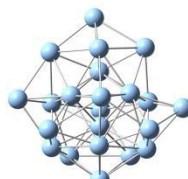

**f\_C<sub>1</sub>, 0.075**

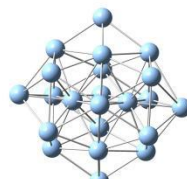

**g\_C<sub>2</sub>, 0.077**

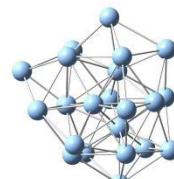

**h\_C<sub>1</sub>, 0.106**

Figure S10. The low-lying eight structures of Ag<sub>21</sub><sup>+</sup> and Ag<sub>22</sub><sup>+</sup> determined by the calculations at the PBE/def2-SVP level of theory. The Ag<sub>21</sub><sup>+</sup> is in its singlet state and the Ag<sub>22</sub><sup>+</sup> is in its doublet state. The geometry of each structure and its energy (in eV) relative to the lowest-lying one was indicated.
