# Supplementary figures and images for: Reactivity of cationic silver clusters with O2: a probe of interplay between clusters’ geometric and electronic structures
Source: Royal Society of Chemistry journal article supplement (doi:10.1039/d3cp05082c), 2024-01-01

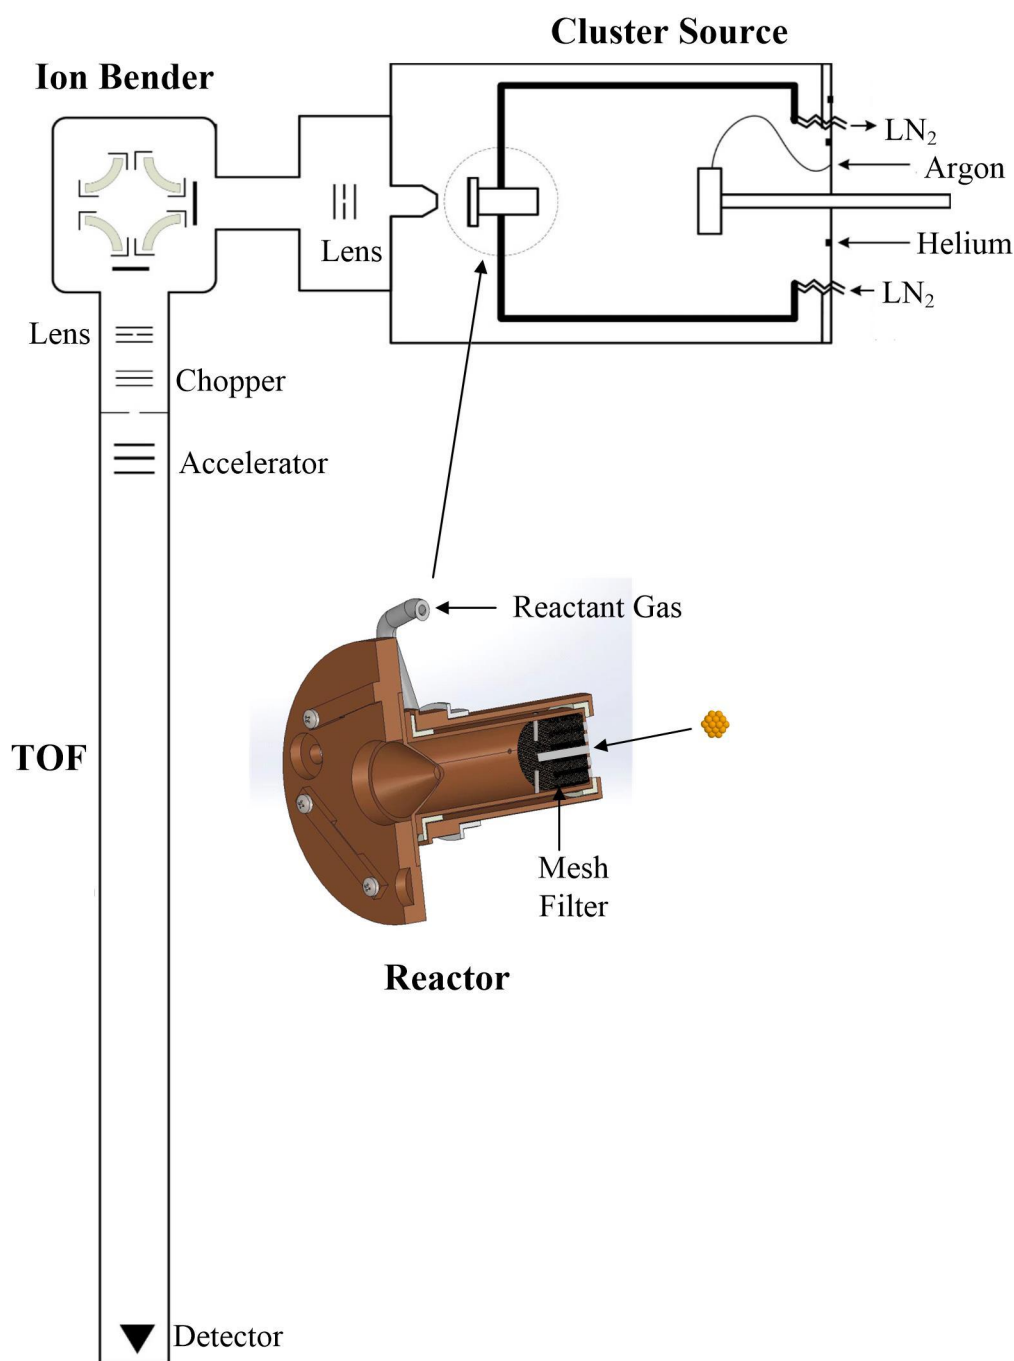

Figure S15. The schematic experimental setup.

Supplement: d3cp05082c3.pdf [file d3cp05082c3.pdf]
